# Supplementary material for: UV-guided isolation of polyynes and polyenes from the roots of Codonopsis pilosula
Source: Royal Society of Chemistry journal article supplement (doi:10.1039/c5ra02765a), 2015-01-01
Supplement: c5ra02765a1.pdf [file c5ra02765a1.pdf]

## UV-Guided Isolation of Polyynes and Polyenes from the Roots of *Codonopsis pilosula*<sup>†</sup>

Chih-Hua Chao,<sup>ab</sup> Shin-Hun Juang,<sup>ac</sup> Hsiu-Hui Chan,<sup>d</sup> De-Yang Shen,<sup>d</sup> Yu-Ren Liao,<sup>d</sup> Hung-Cheng Shih,<sup>d</sup> Chieh-Hung Huang,<sup>d</sup> Ju-Chien Cheng<sup>e</sup> and

Tian-Shung Wu<sup>\*fg</sup>

<sup>a</sup> School of Pharmacy, China Medical University, Taichung 404

<sup>b</sup> Chinese Medicine Research and Development Center, China Medical University Hospital, Taichung 404, Taiwan

<sup>c</sup> Department of Medical Research, China Medical University Hospital, Taichung 404, Taiwan

<sup>d</sup> Department of Chemistry, National Cheng Kung University, Tainan 701, Taiwan

<sup>e</sup> Department of Medical Laboratory Science and Biotechnology, China Medical University, Taichung 404, Taiwan

<sup>f</sup> School of Pharmacy, National Cheng Kung University, Tainan 701, Taiwan. E-mail: [tswu@mail.ncku.edu.tw](mailto:tswu@mail.ncku.edu.tw); Fax: +886-6-2740552; Tel: +886-6-2757575

ext.65333

<sup>g</sup> Department of Pharmacy and Graduate Institute of Pharmaceutical Technology, Tajen University, Pingtung 907, Taiwan

**For compound 1:**

**Figure S1-1.**  $^1\text{H}$  NMR spectrum (500 MHz) of compound **1** in  $\text{CD}_3\text{OD}$ .

**Figure S1-2.**  $^{13}\text{C}$  NMR spectrum (125 MHz) of compound **1** in  $\text{CD}_3\text{OD}$ .

**For compound 2:**

**Figure S2-1.**  $^1\text{H}$  NMR spectrum (400 MHz) of compound **2** in  $\text{CD}_3\text{OD}$ .

**Figure S2-2.**  $^{13}\text{C}$  NMR spectrum (100 MHz) of compound **2** in  $\text{CD}_3\text{OD}$ .

**For compound 3:**

**Figure S3-1.**  $^1\text{H}$  NMR spectrum (300 MHz) of compound **3** in  $\text{CD}_3\text{OD}$ .

**Figure S3-2.**  $^{13}\text{C}$  NMR spectrum (75 MHz) of compound **3** in  $\text{CD}_3\text{OD}$ .

**For compound 4:**

**Figure S4-1.**  $^1\text{H}$  NMR spectrum (400 MHz) of compound **4** in  $\text{CD}_3\text{OD}$ .

**Figure S4-2.**  $^{13}\text{C}$  NMR spectrum (100 MHz) of compound **4** in  $\text{CD}_3\text{OD}$ .

**For compound 5:**

**Figure S5-1.**  $^1\text{H}$  NMR spectrum (400 MHz) of compound **5** in  $\text{CD}_3\text{OD}$ .

**Figure S5-2.**  $^{13}\text{C}$  NMR spectrum (100 MHz) of compound **5** in  $\text{CD}_3\text{OD}$ .

**For compound 6:**

**Figure S6-1.**  $^1\text{H}$  NMR spectrum (500 MHz) of compound **6** in  $\text{CD}_3\text{OD}$ .

**Figure S6-2.**  $^{13}\text{C}$  NMR spectrum (125 MHz) of compound **6** in  $\text{CD}_3\text{OD}$ .

**For compound 7:**

**Figure S7-1.**  $^1\text{H}$  NMR spectrum (400 MHz) of compound **7** in  $\text{CD}_3\text{OD}$ .

**Figure S7-2.**  $^{13}\text{C}$  NMR spectrum (100 MHz) of compound **7** in  $\text{CD}_3\text{OD}$ .

CPMA 32224 CD3OD 2009/2/3 AV500

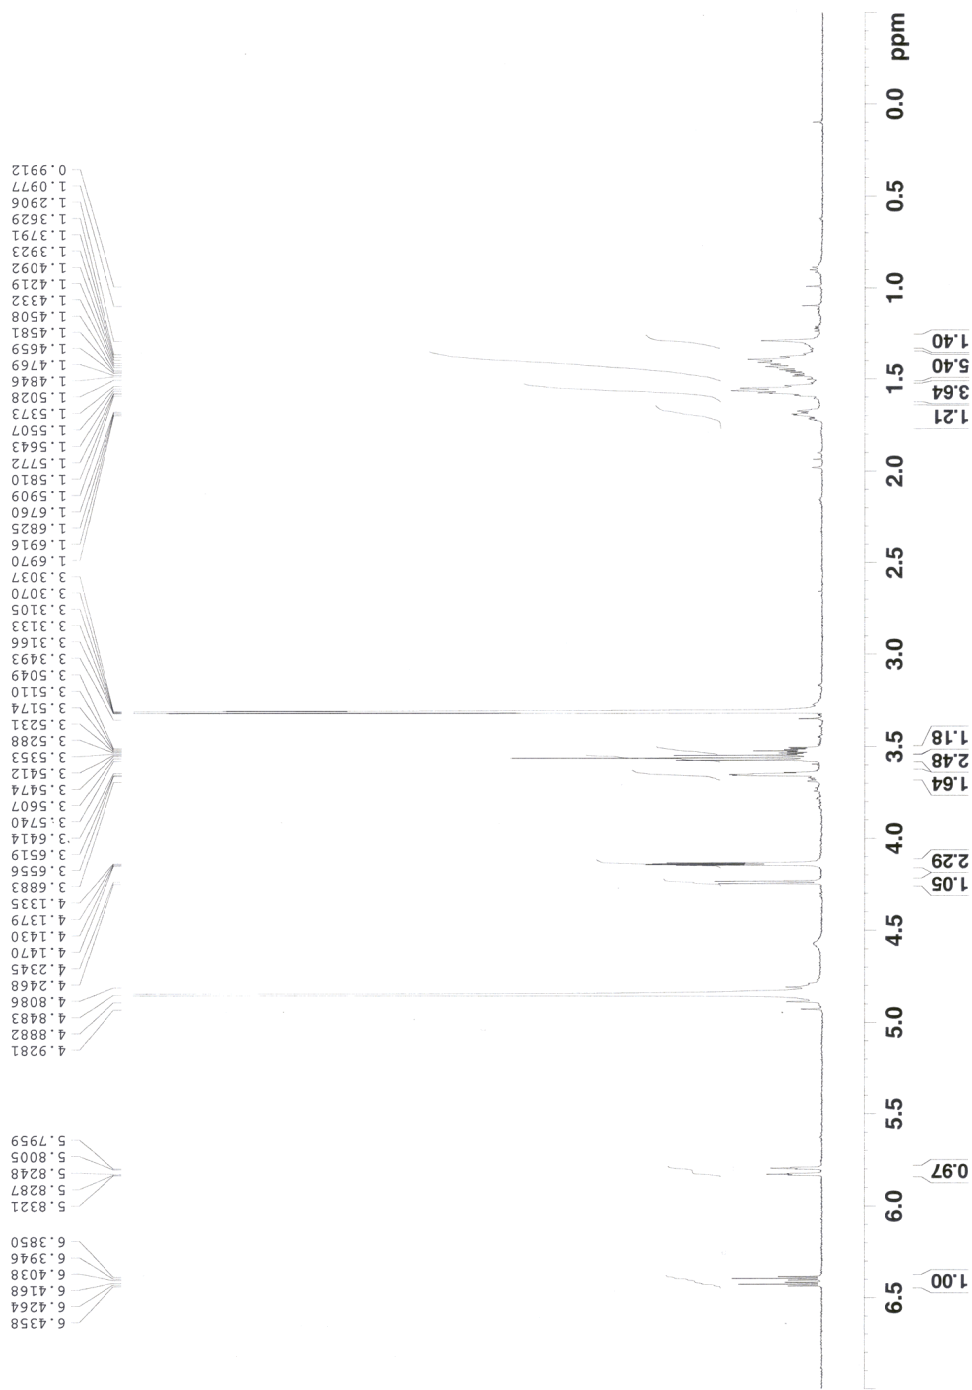

Figure S1-1. <sup>1</sup>H NMR spectrum (500 MHz) of compound **1** in CD<sub>3</sub>OD.

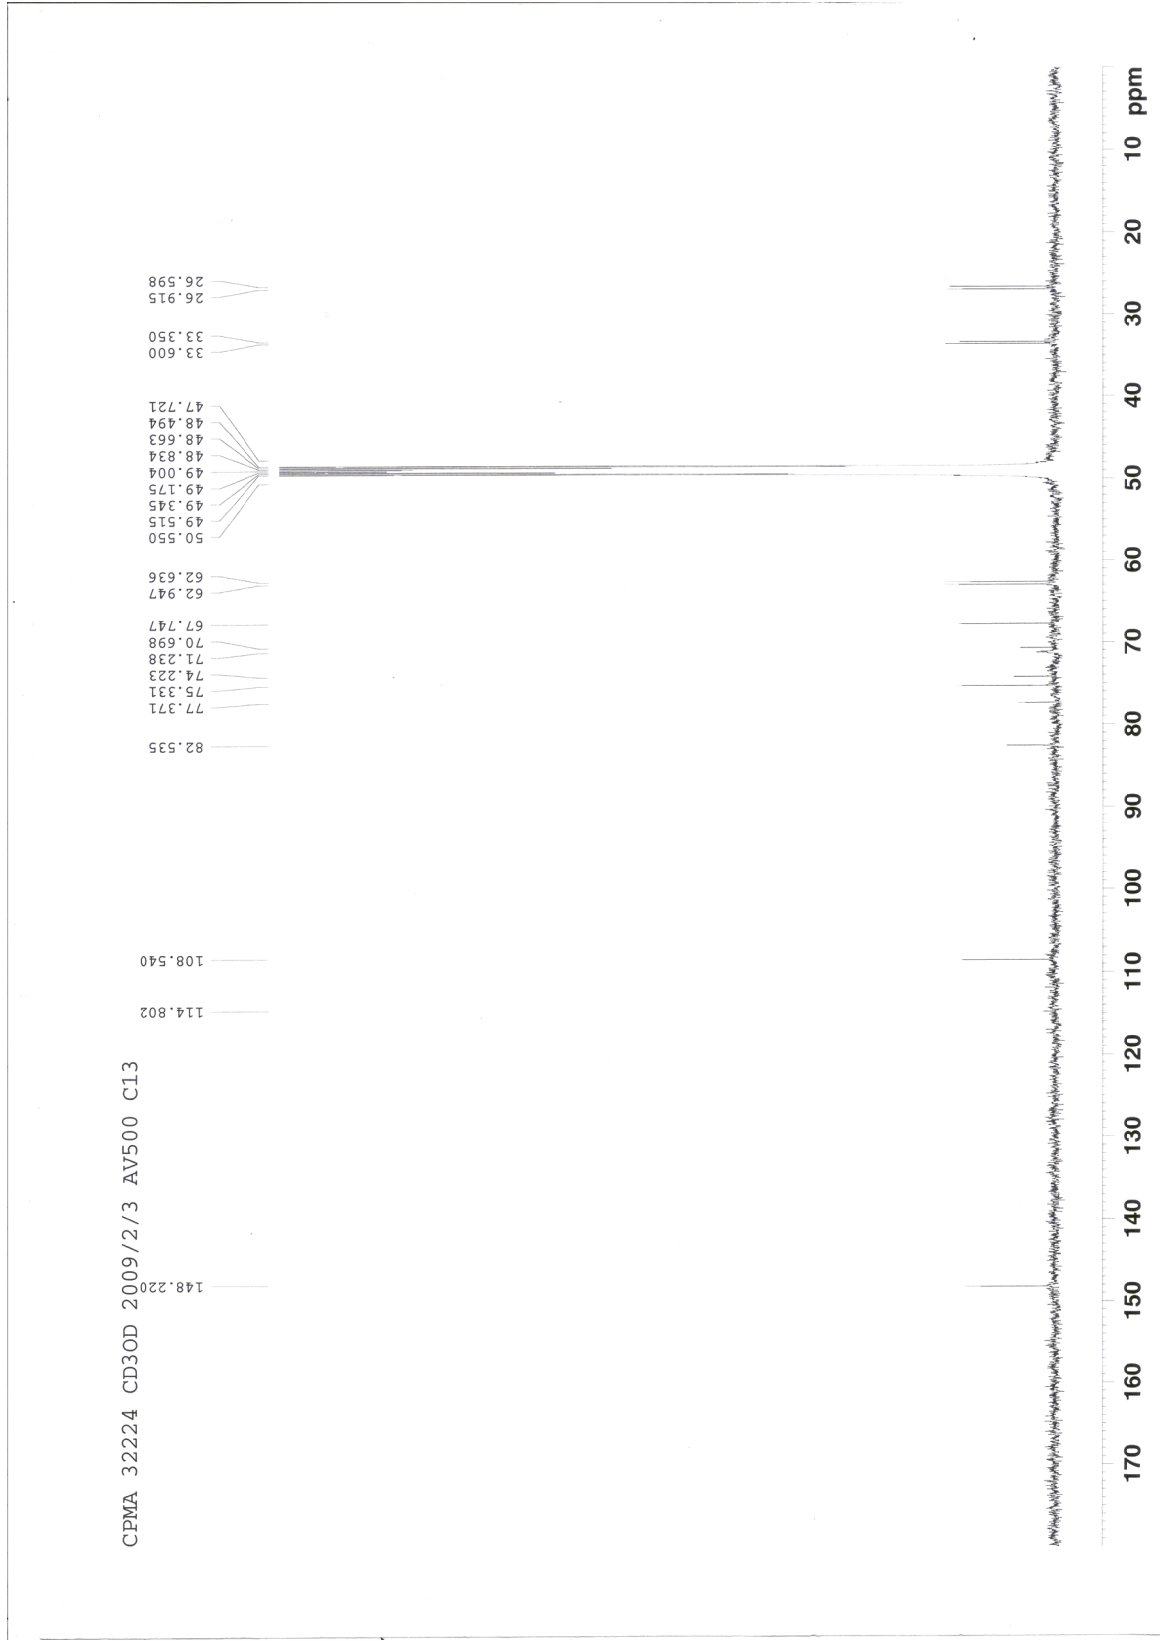

**Figure S1-2.**  $^{13}\text{C}$  NMR spectrum (125 MHz) of compound **1** in  $\text{CD}_3\text{OD}$ .

CPMA32213 Methanol-d4 2009/7/14 AMX AX400 <sup>1</sup>H

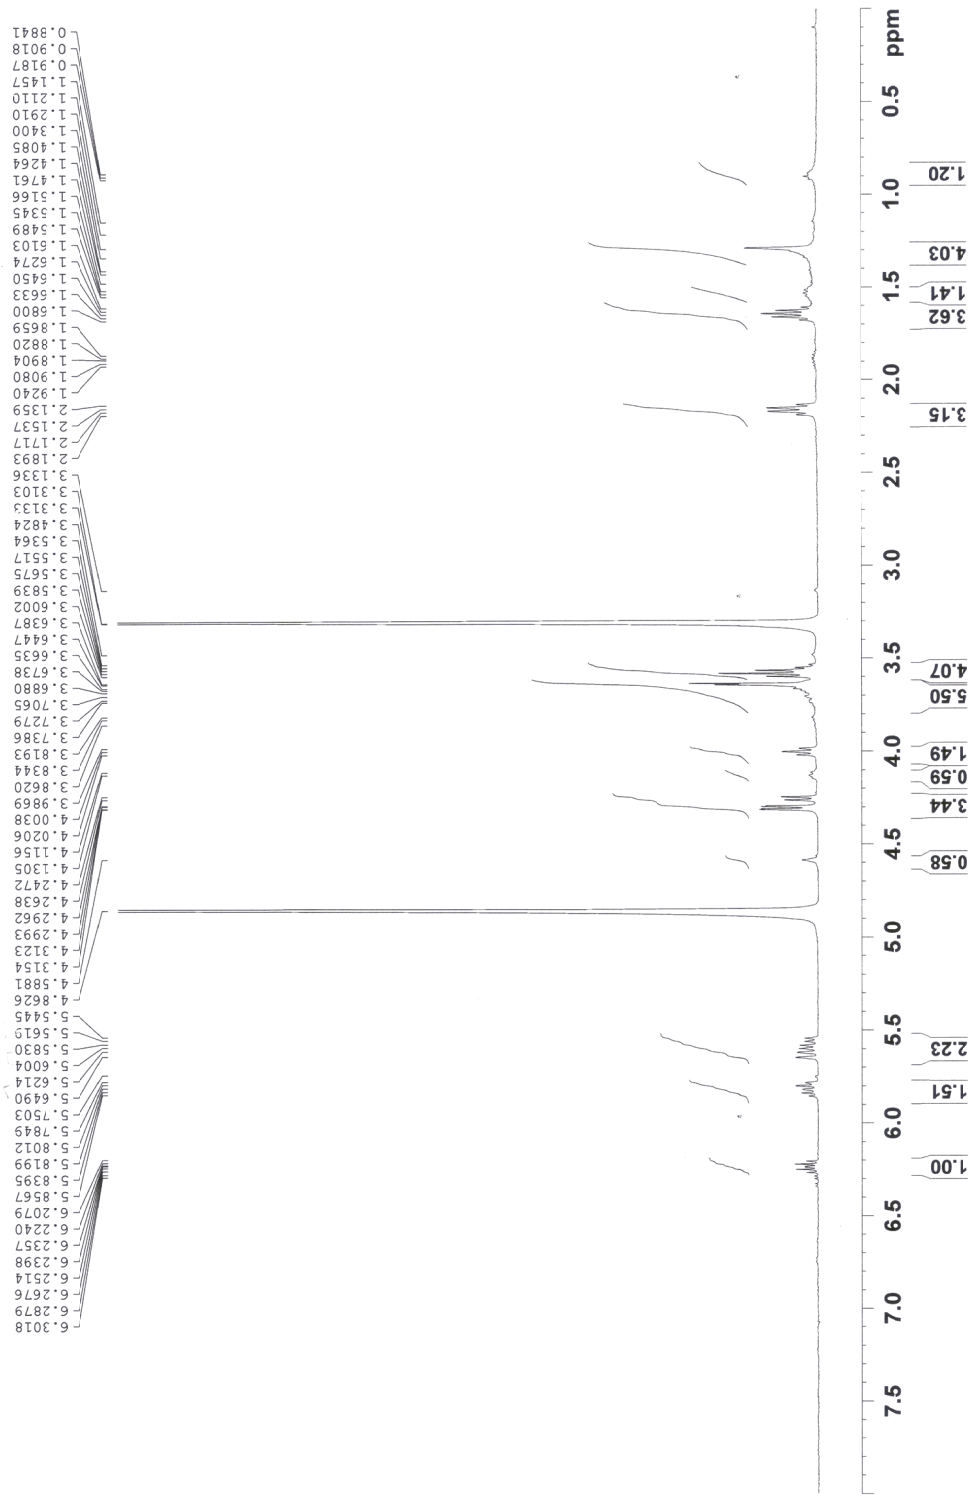

Figure S2-1. <sup>1</sup>H NMR spectrum (400 MHz) of compound 2 in CD<sub>3</sub>OD.

CPMA32213 Methanol 2009/7/14 AMX400 C13

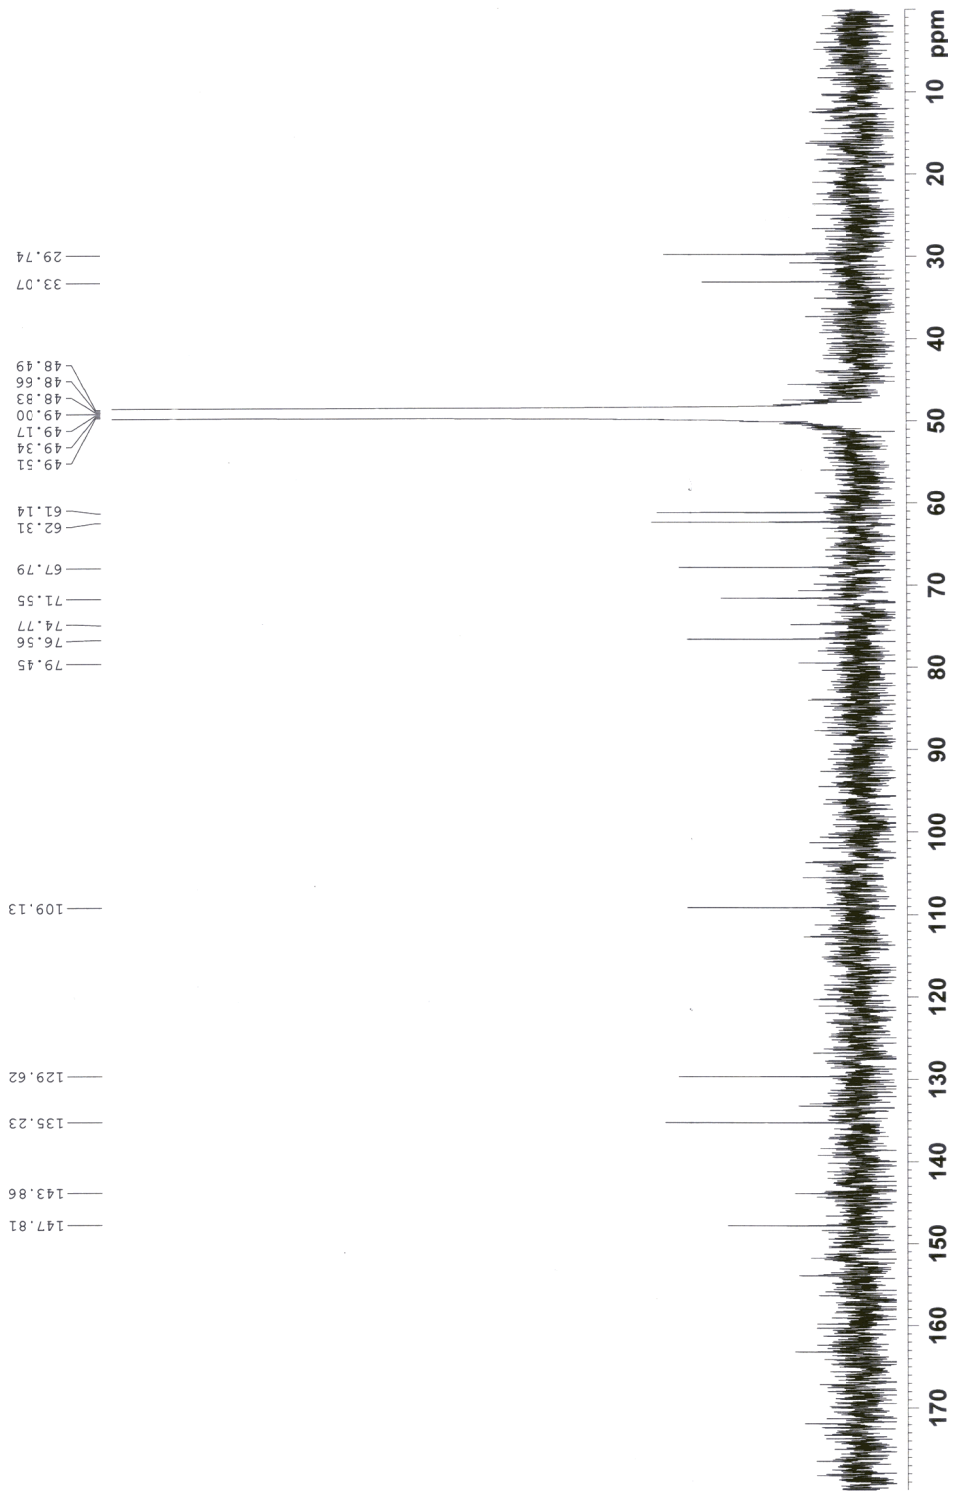

Figure S2-2.  $^{13}\text{C}$  NMR spectrum (100 MHz) of compound 2 in  $\text{CD}_3\text{OD}$ .

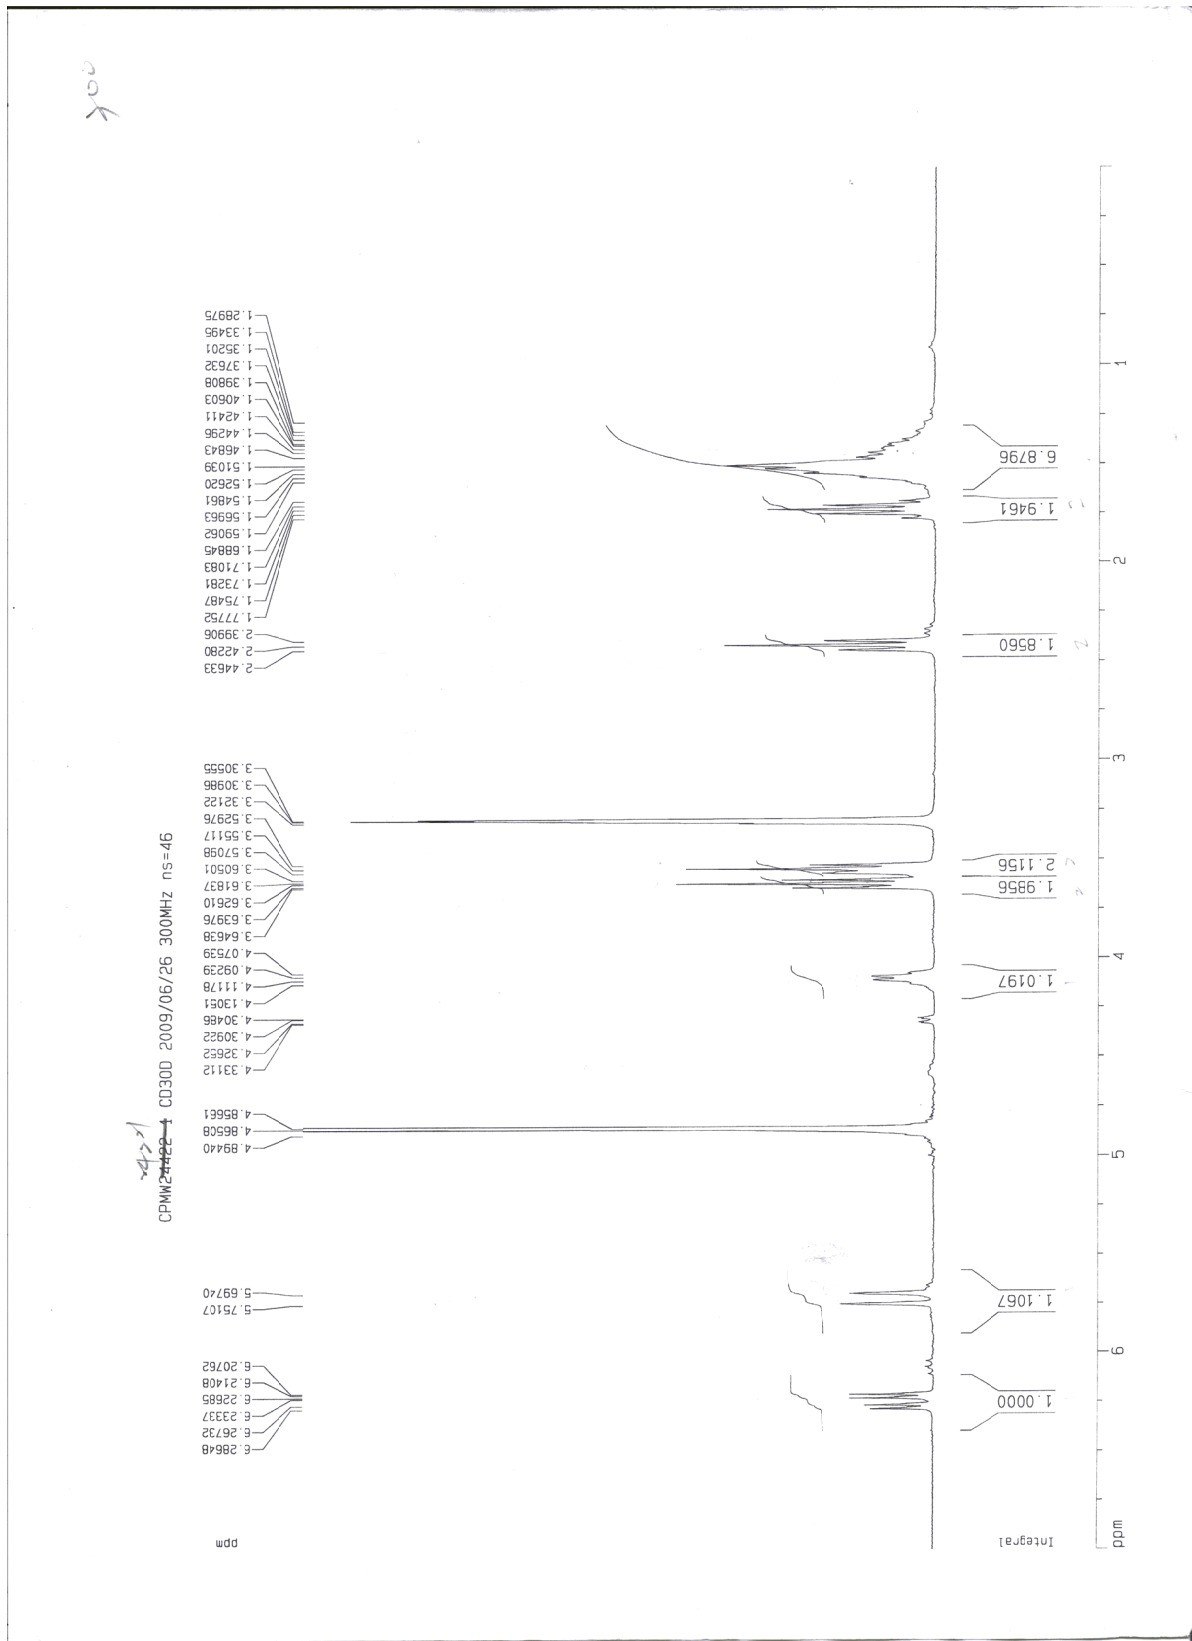

Figure S3-1. <sup>1</sup>H NMR spectrum (300 MHz) of compound **3** in CD<sub>3</sub>OD.

CPMA 24221 CD30D 2009/7/4 AV300 C:13

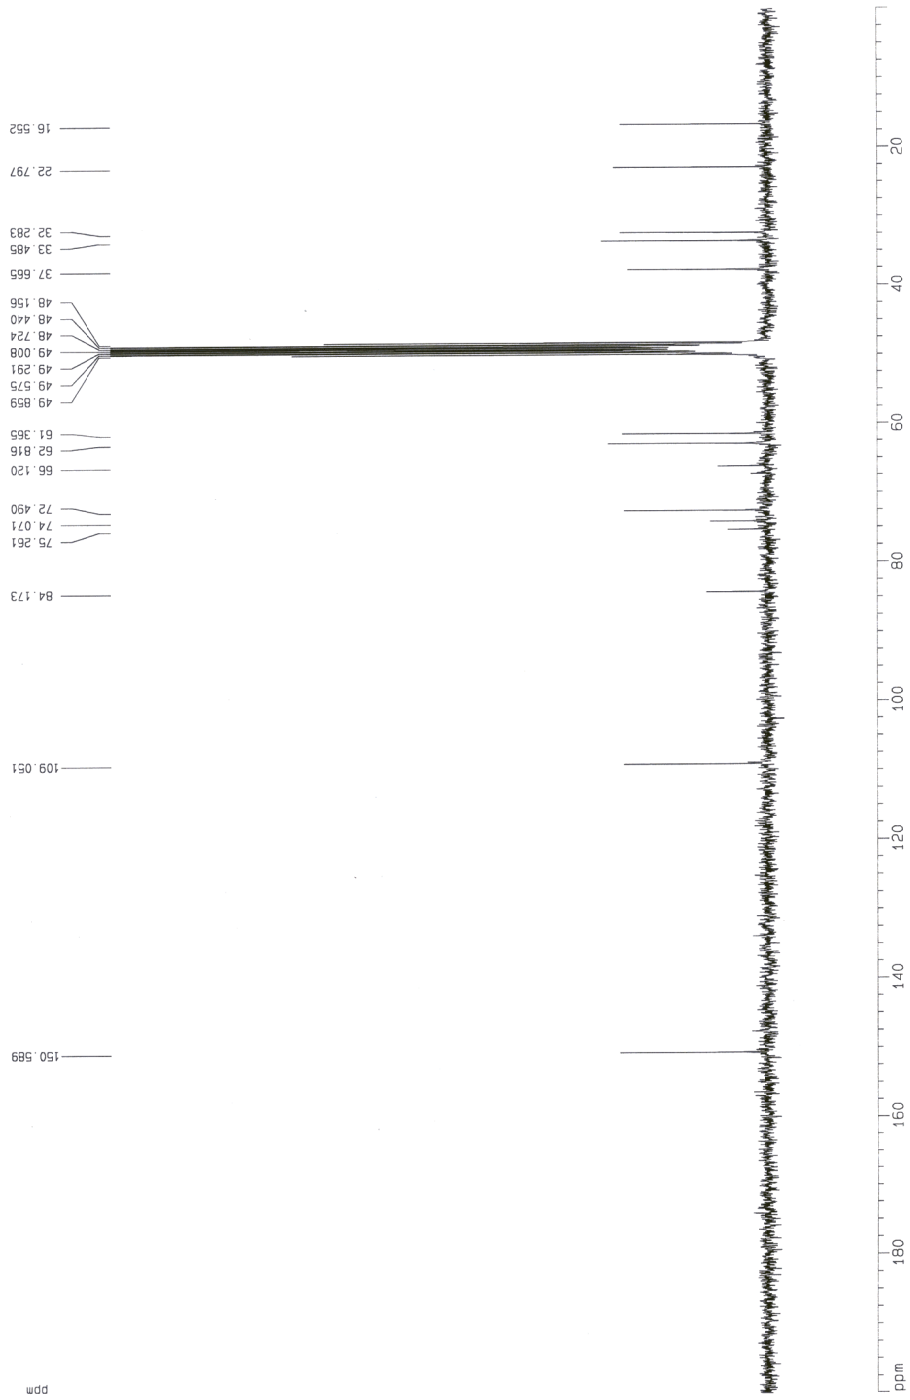

**Figure S3-2.**  $^{13}\text{C}$  NMR spectrum (75 MHz) of compound **3** in  $\text{CD}_3\text{OD}$ .



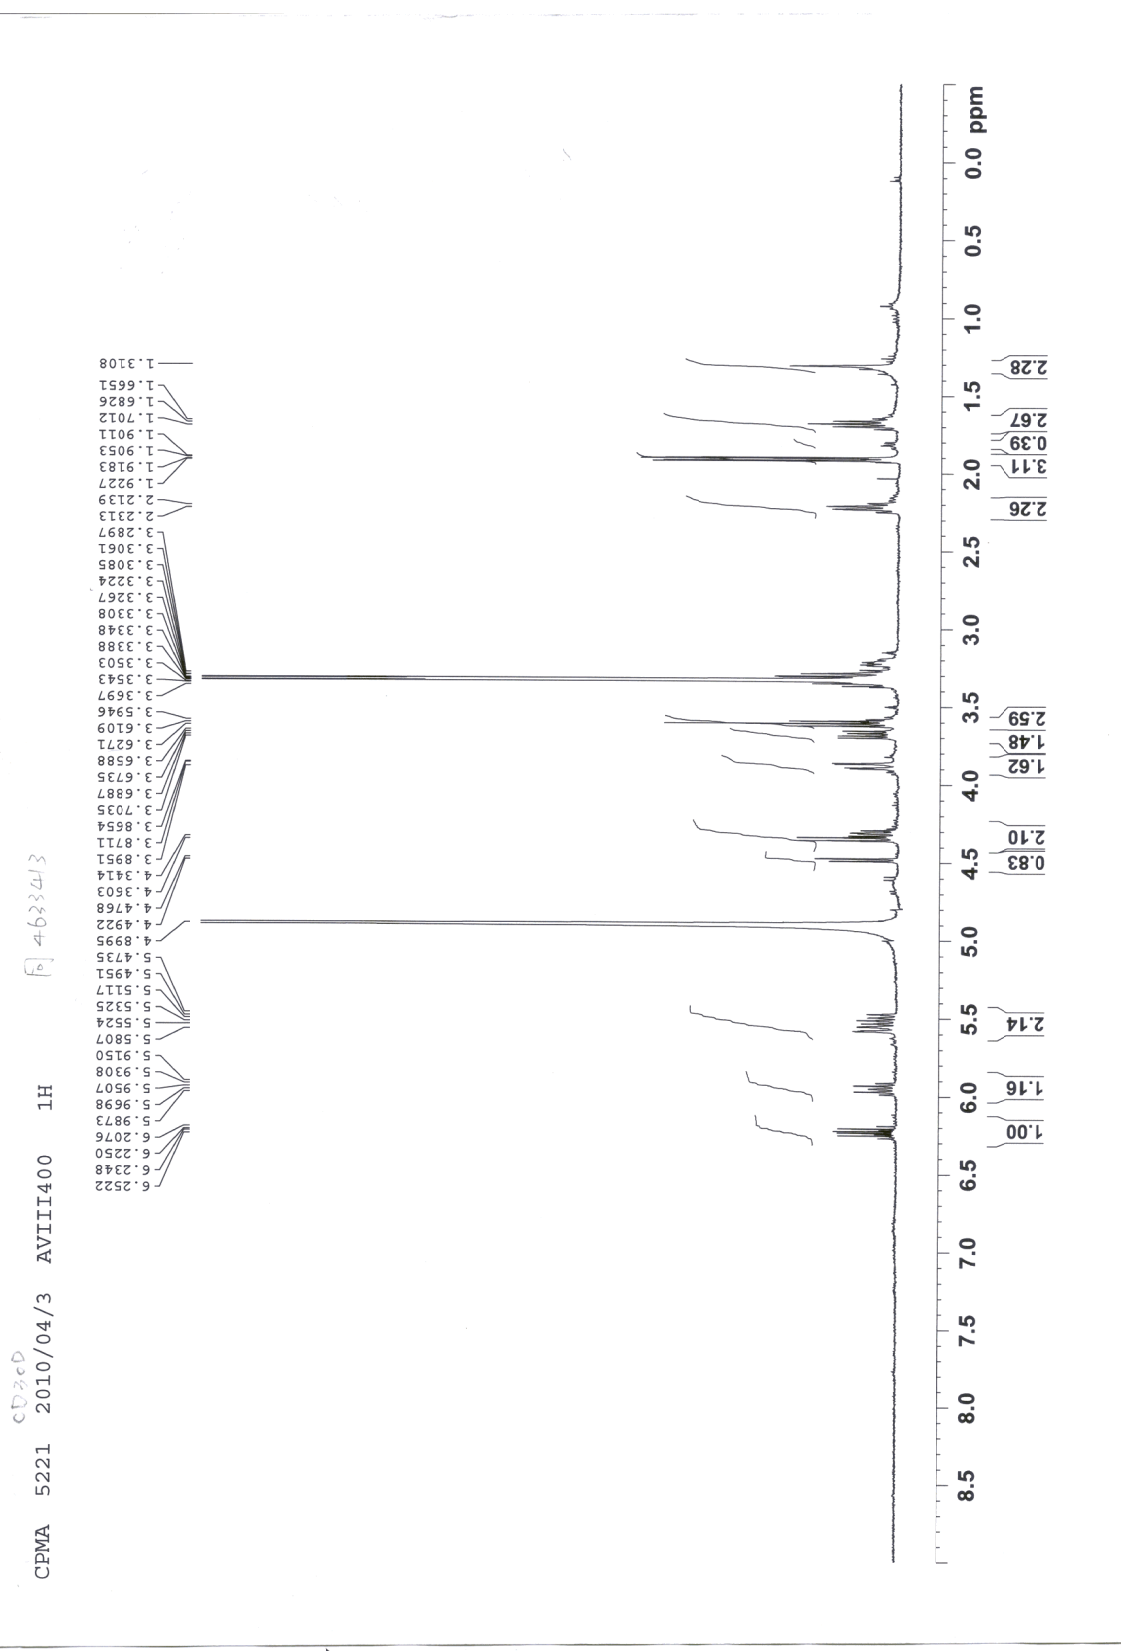

Figure S4-1.  $^1\text{H}$  NMR spectrum (400 MHz) of compound **4** in  $\text{CD}_3\text{OD}$ .

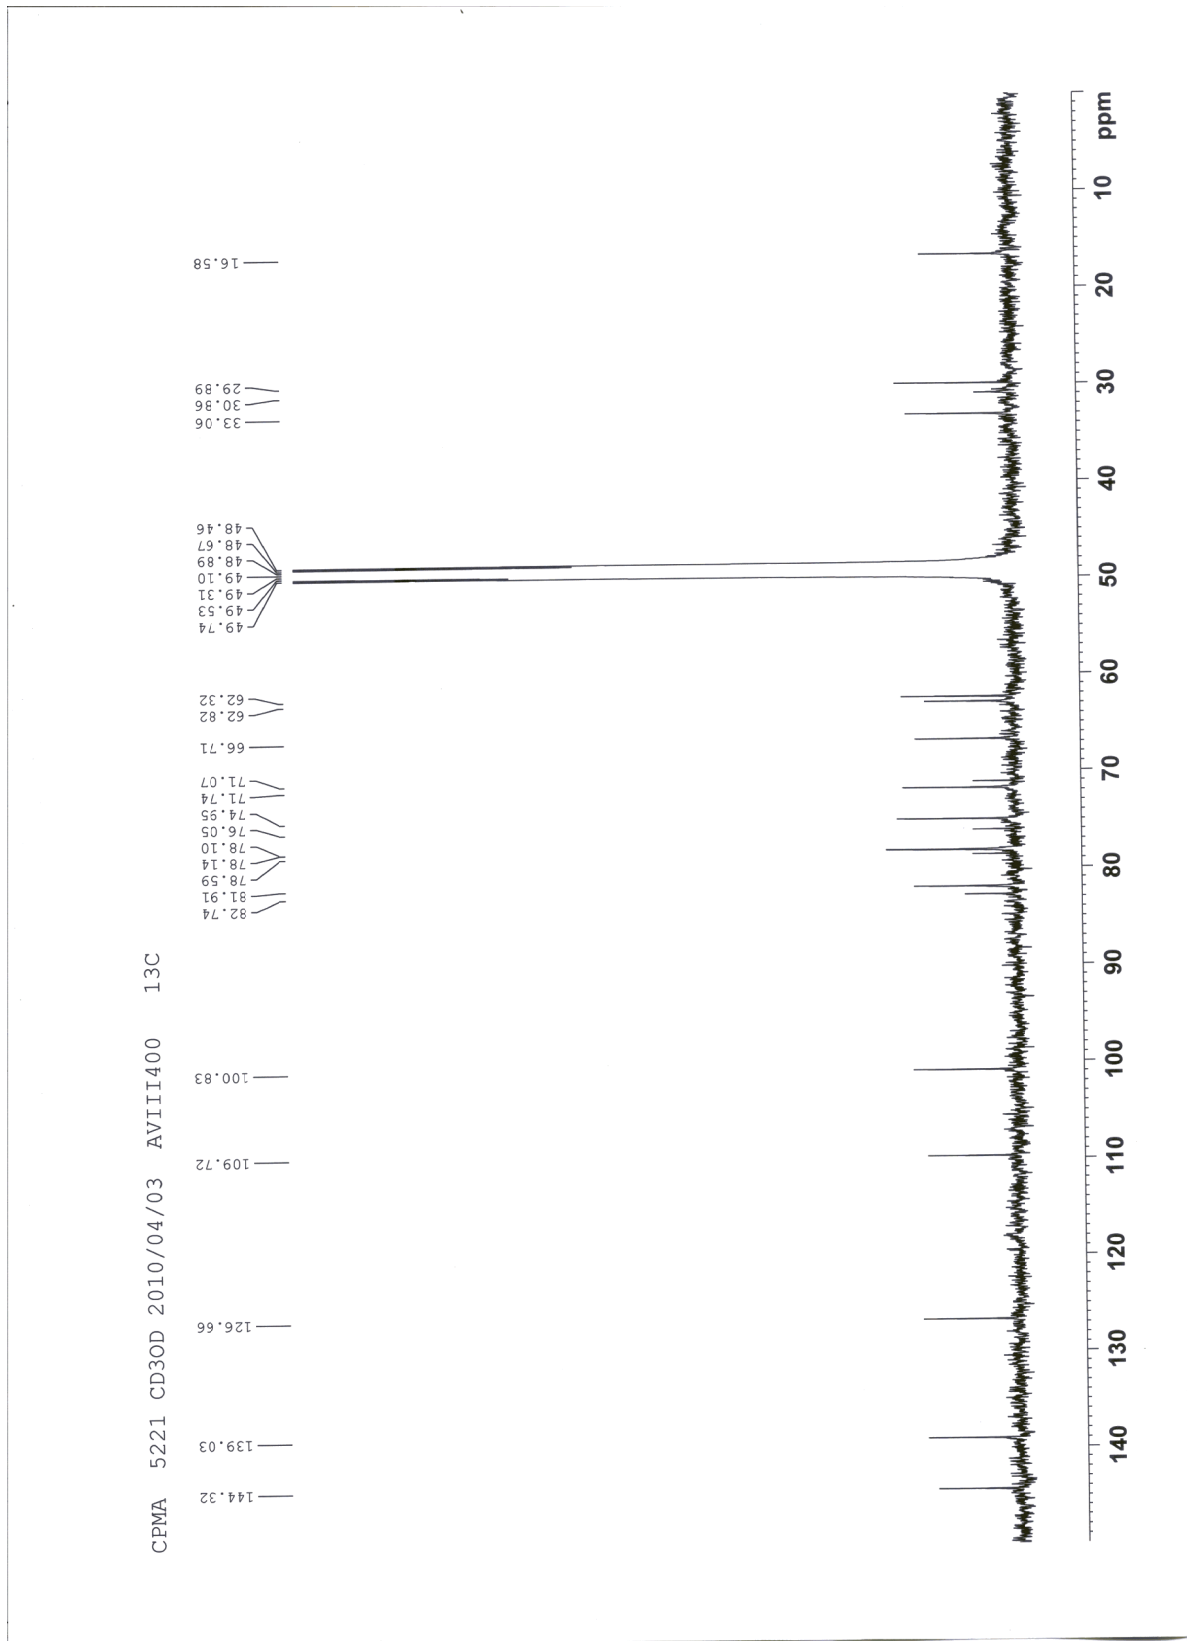

**Figure S4-2.**  $^{13}\text{C}$  NMR spectrum (100 MHz) of compound **4** in  $\text{CD}_3\text{OD}$ .

cpma54332214-2 CD3OD 2010/08/02 AVIII 400 1H

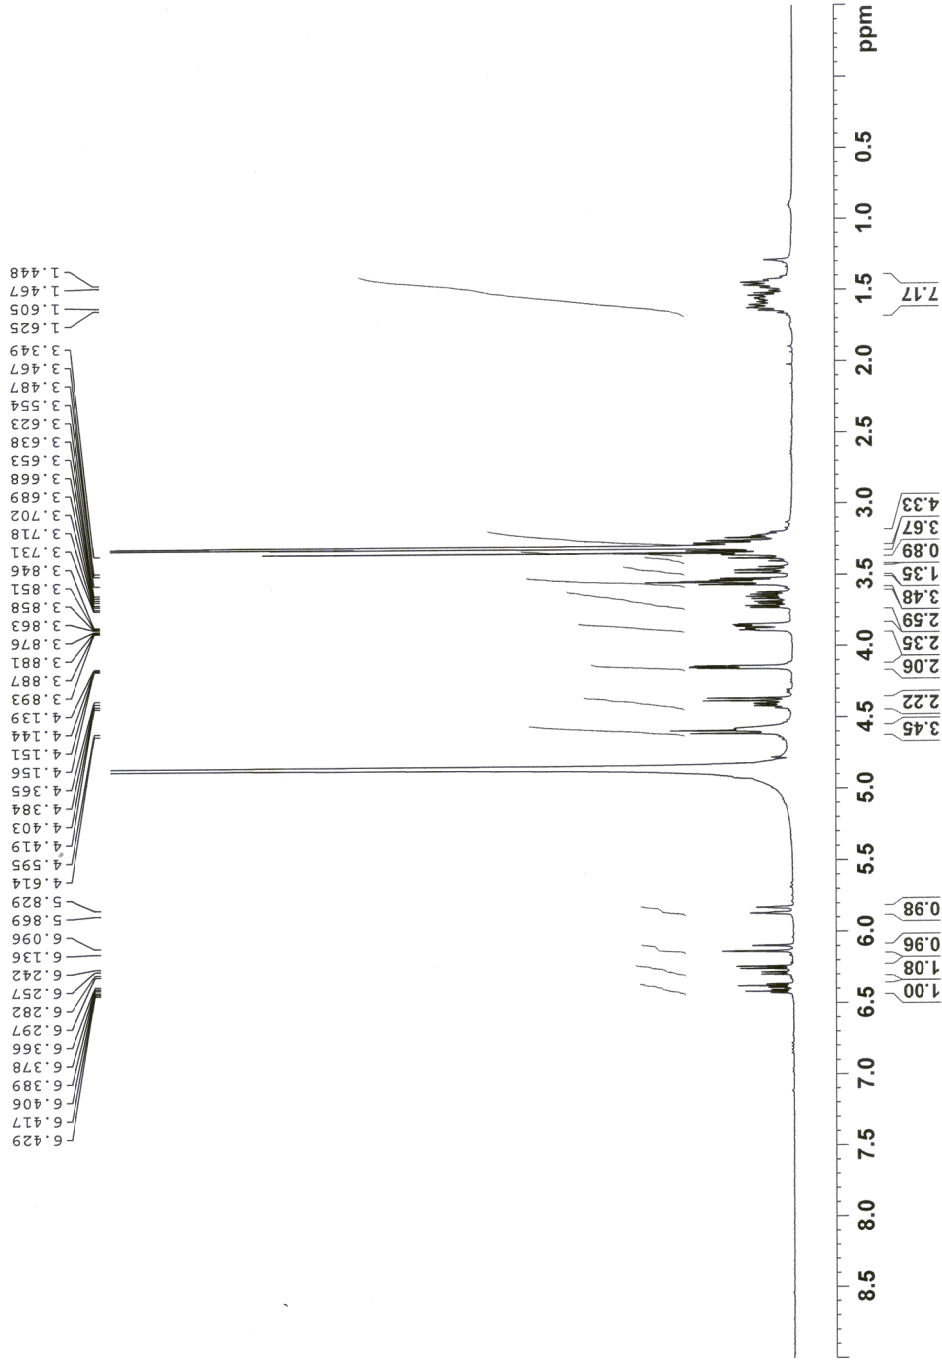

Figure S5-1. <sup>1</sup>H NMR spectrum (400 MHz) of compound **5** in CD<sub>3</sub>OD.

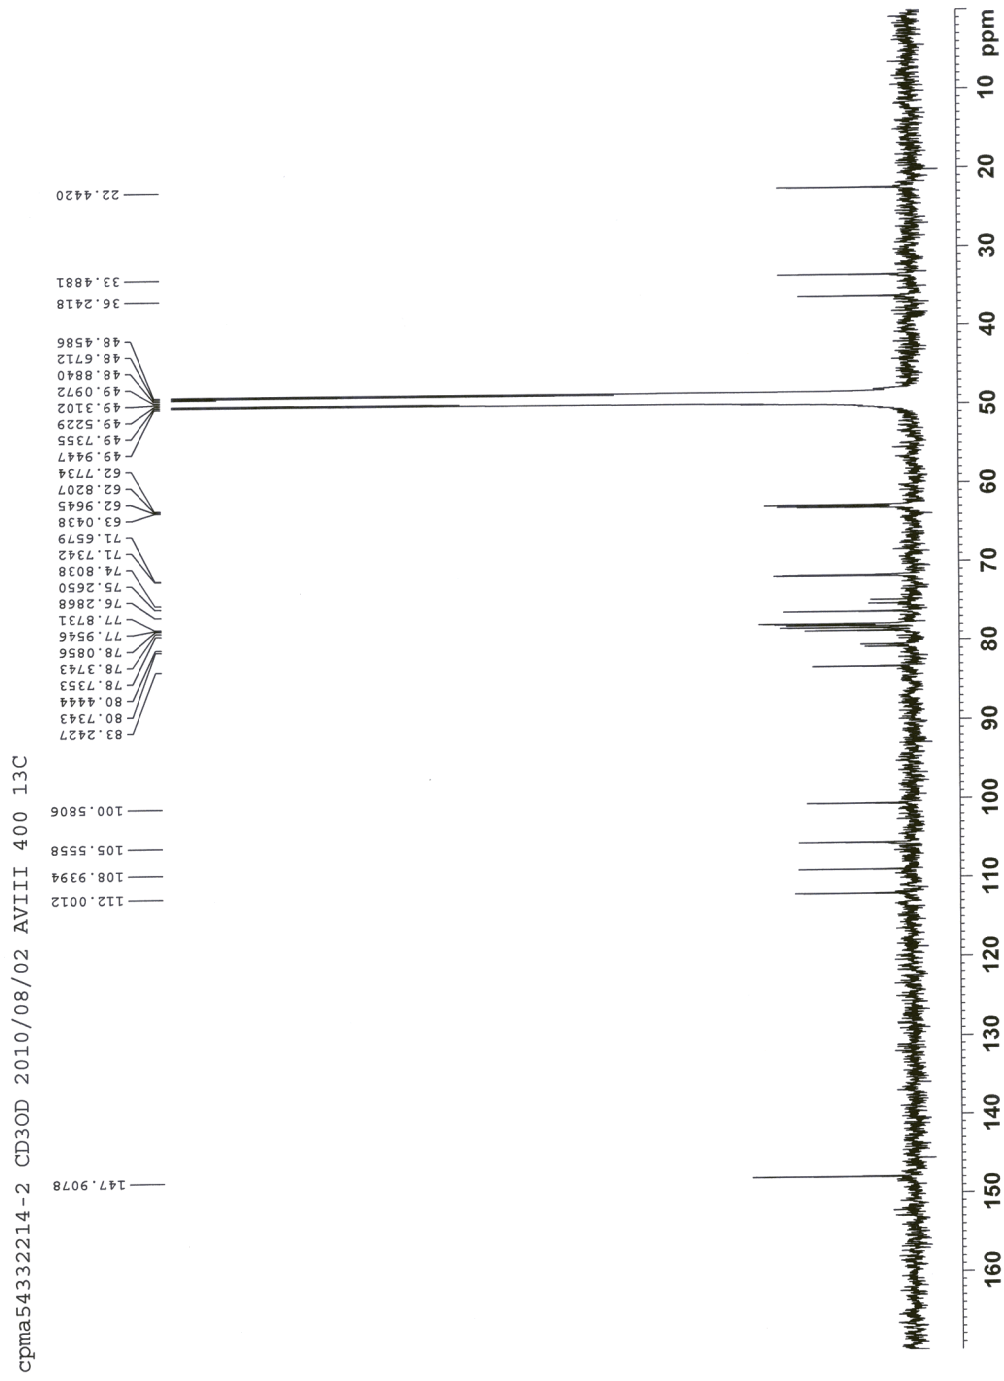

Figure S5-2.  $^{13}\text{C}$  NMR spectrum (100 MHz) of compound **5** in  $\text{CD}_3\text{OD}$ .

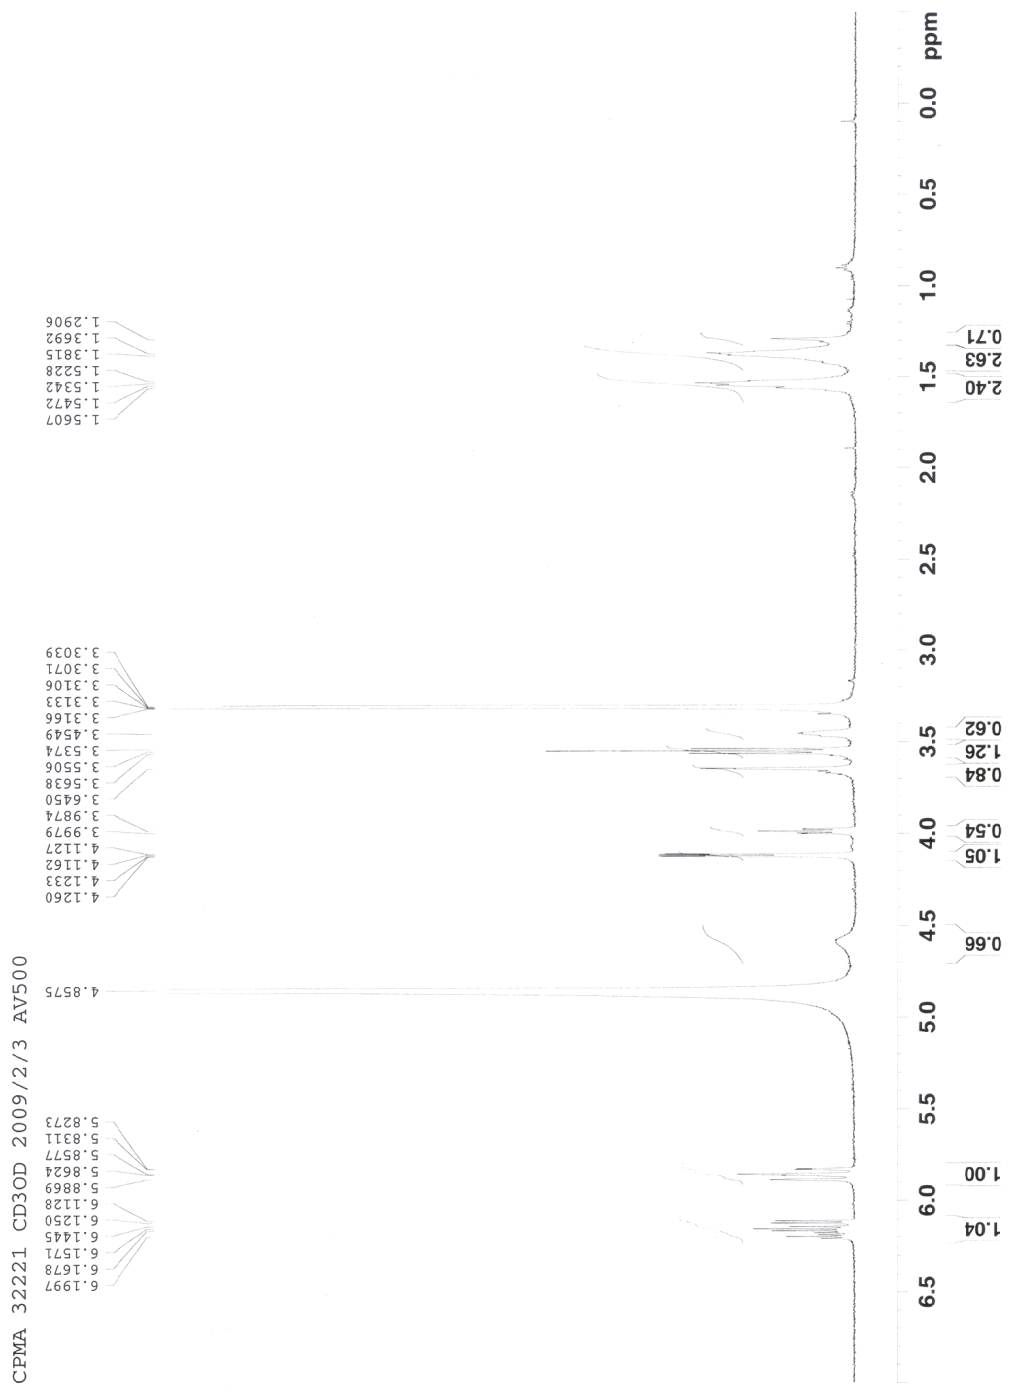

**Figure S6-1.**  $^1\text{H}$  NMR spectrum (500 MHz) of compound **6** in  $\text{CD}_3\text{OD}$ .

CPMA 32221 CD3OD 2009/2/3 AV500 C13

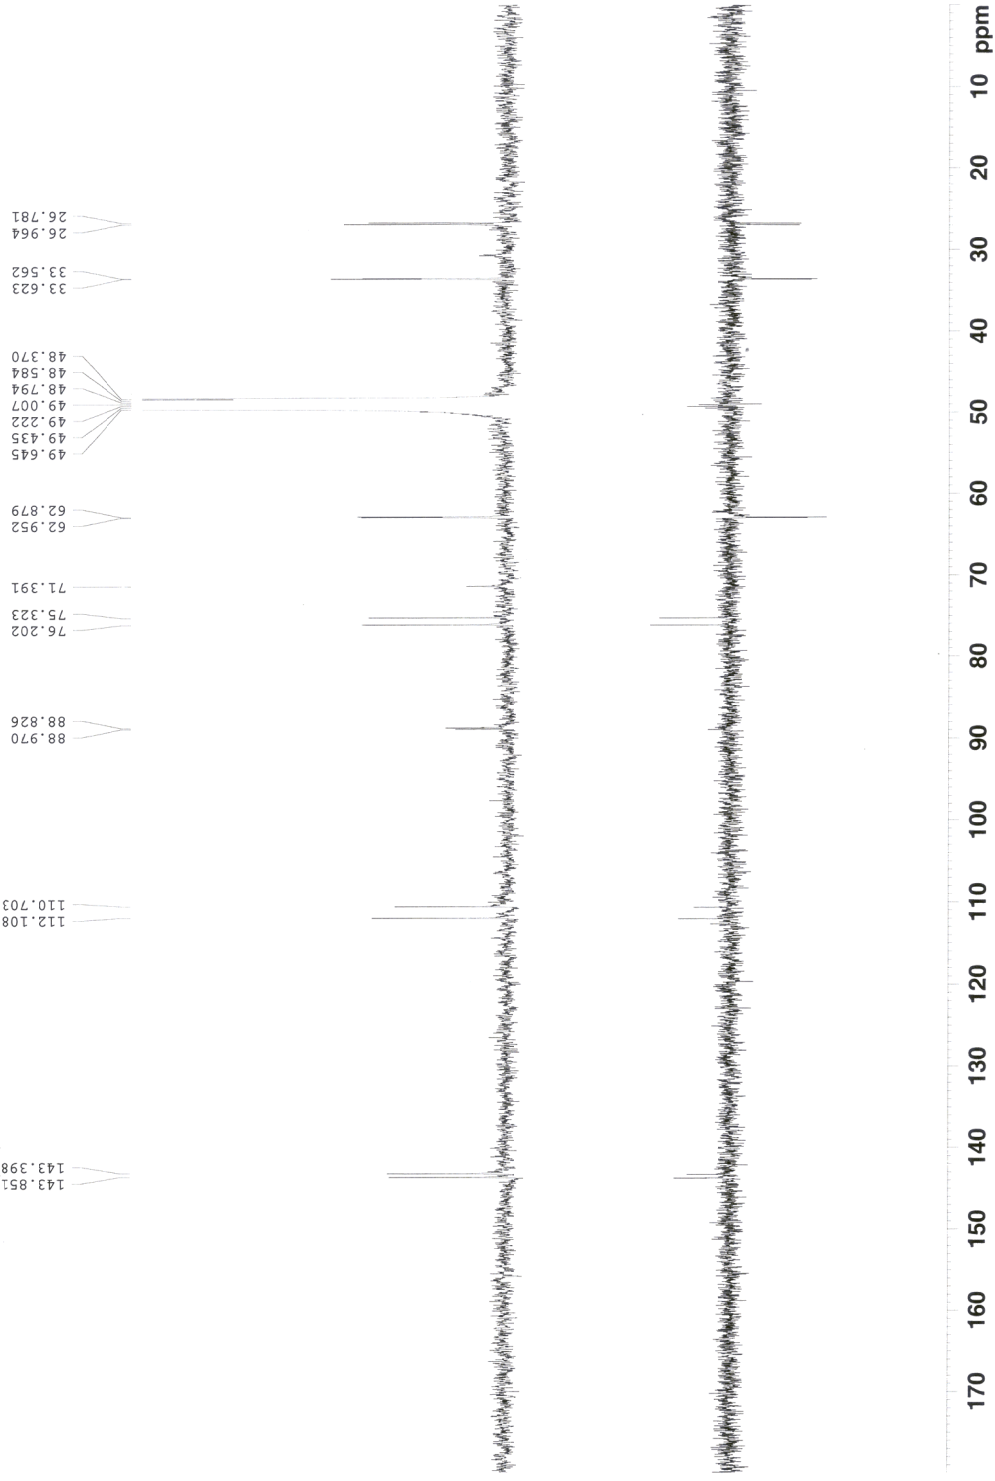

Figure S6-2.  $^{13}\text{C}$  NMR spectrum (125 MHz) of compound **6** in  $\text{CD}_3\text{OD}$ .

CPMA 32211 CD30D 2009/1/13 AMX400

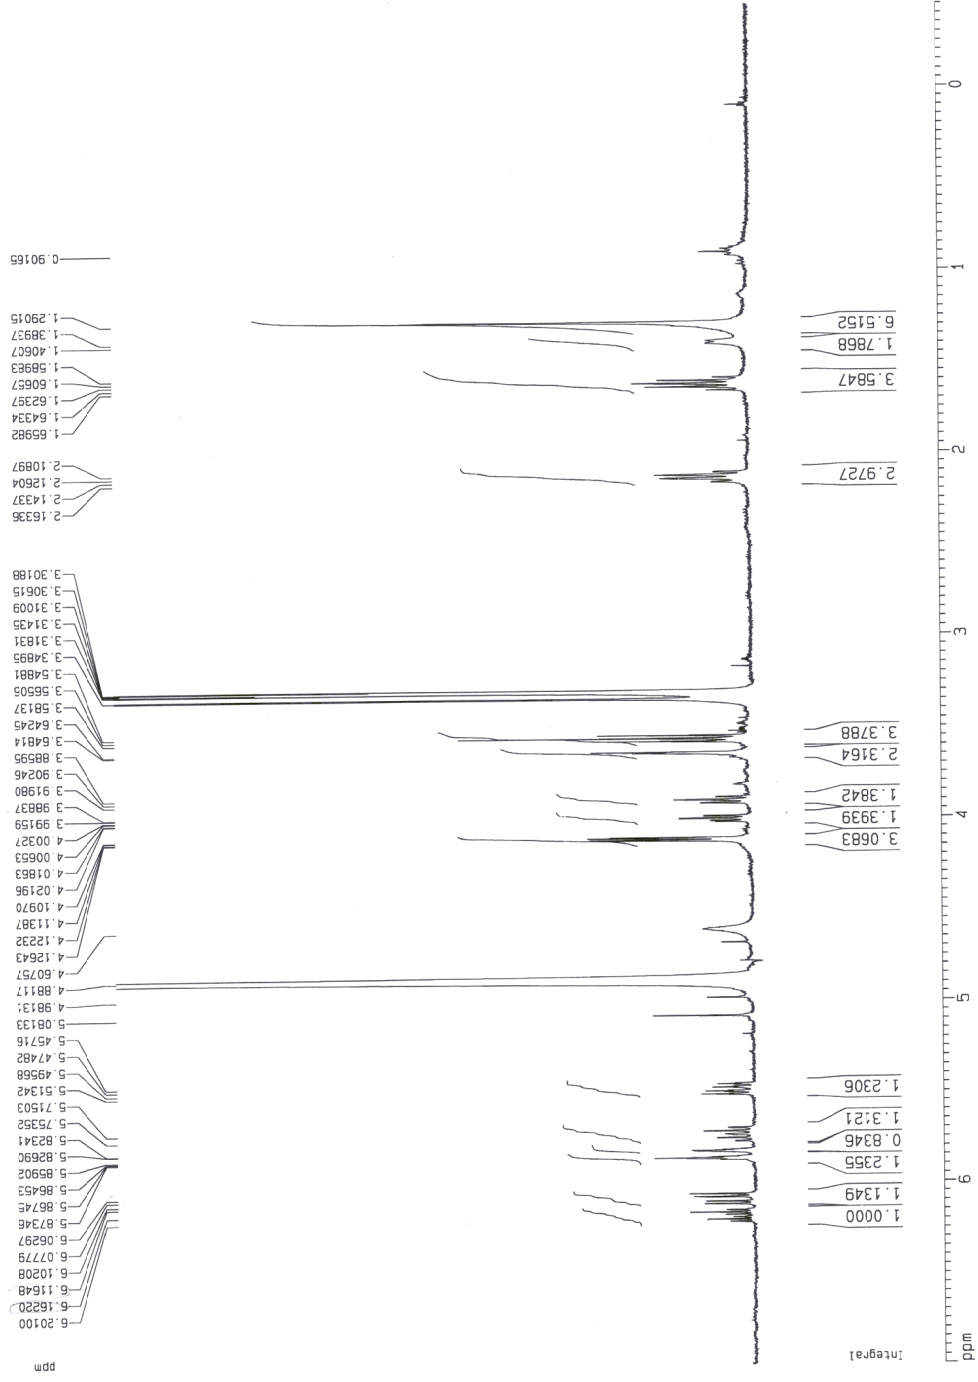

Figure S7-1. <sup>1</sup>H NMR spectrum (400 MHz) of compound 7 in CD<sub>3</sub>OD.

CPMA3-2-2-1-1 CDC03 2009/01/08 AMX400 C13

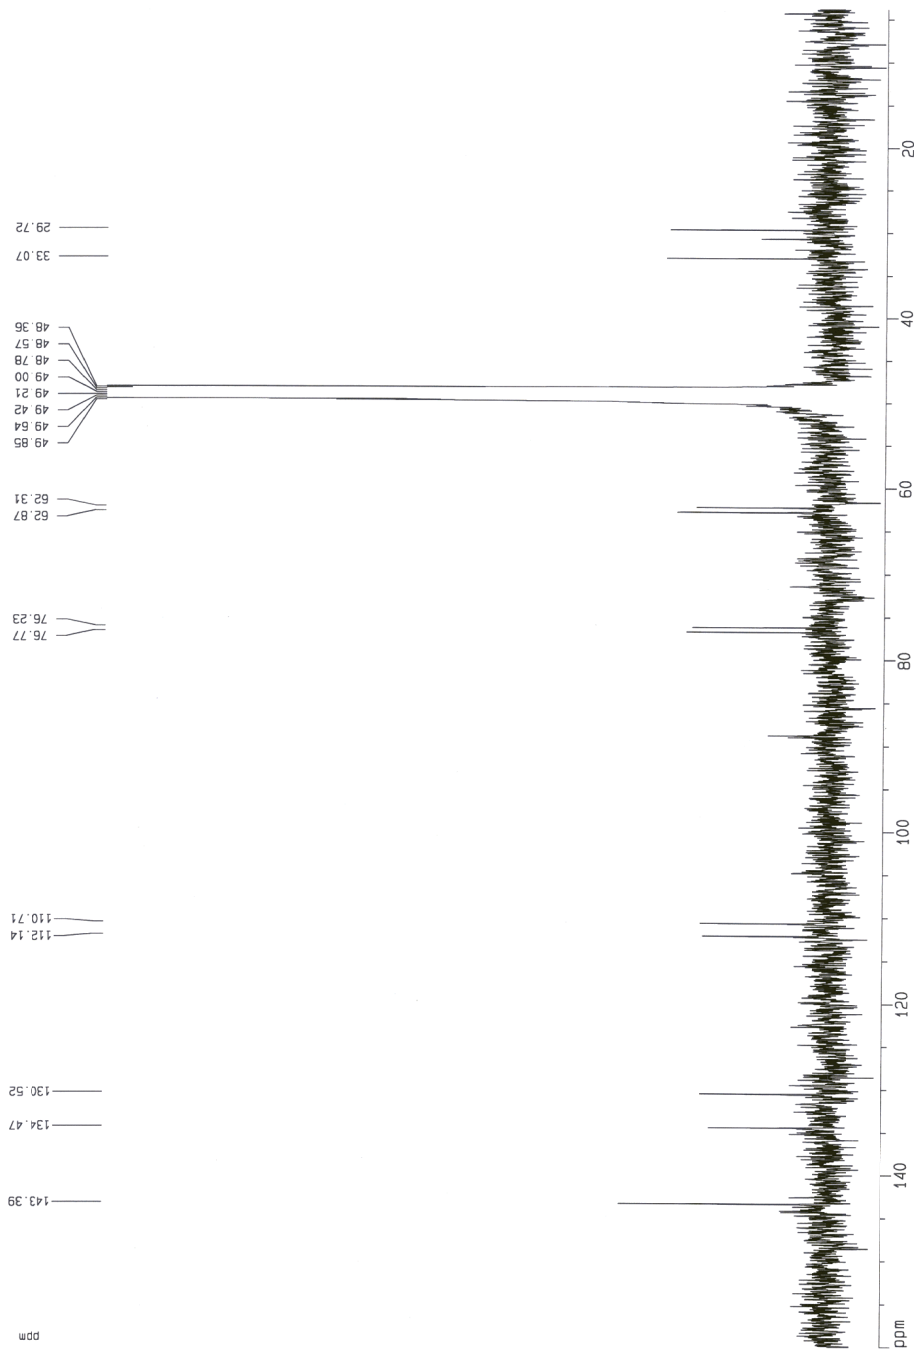

Figure S7-2.  $^{13}\text{C}$  NMR spectrum (100 MHz) of compound 7 in  $\text{CD}_3\text{OD}$ .
