# Supplementary material for: UV-guided isolation of polyynes and polyenes from the roots of Codonopsis pilosula
Source: Royal Society of Chemistry journal article supplement (doi:10.1039/c5ra02765a), 2015-01-01
Supplement: c5ra02765a2.pdf [file c5ra02765a2.pdf]

UV spectra of fractions CPM-2 to CPM-5, containing polyynes or polyynes, are listed as follows:

1

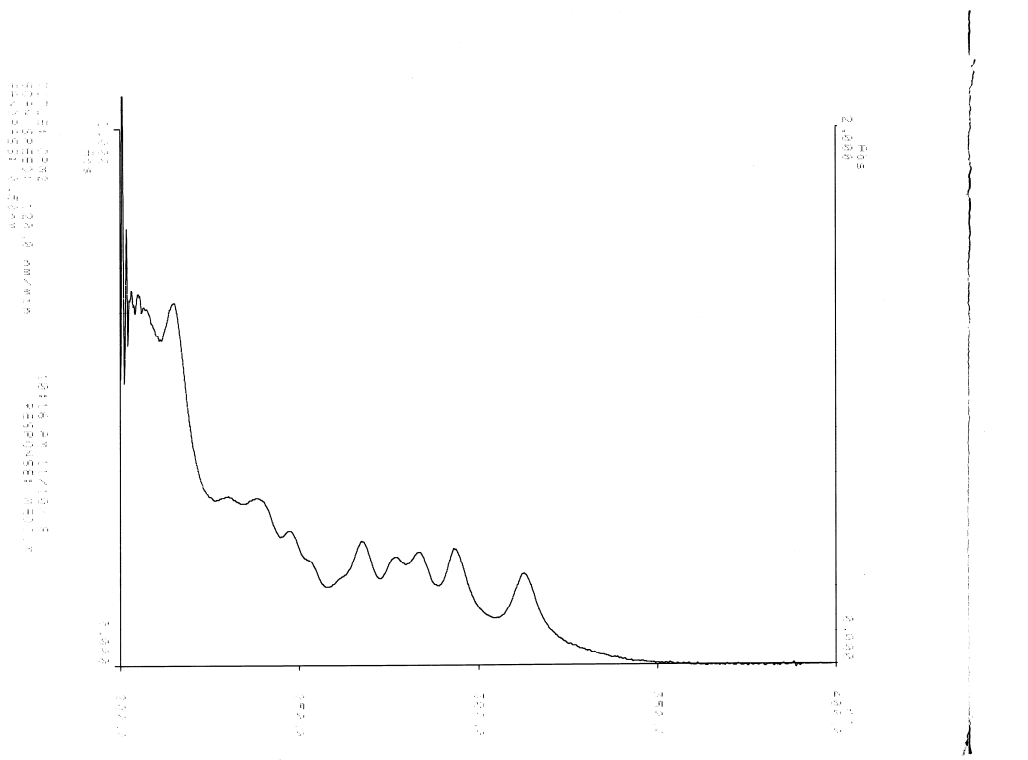

UV spectrum of fraction CPM-2

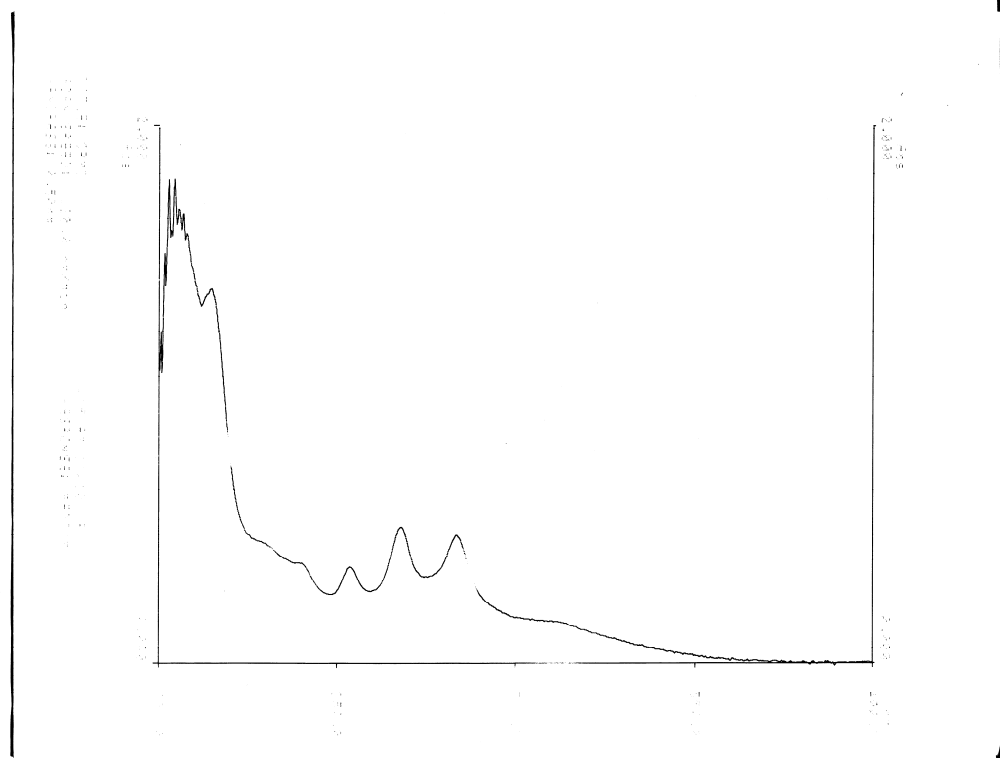

UV spectrum of fraction CPM-3

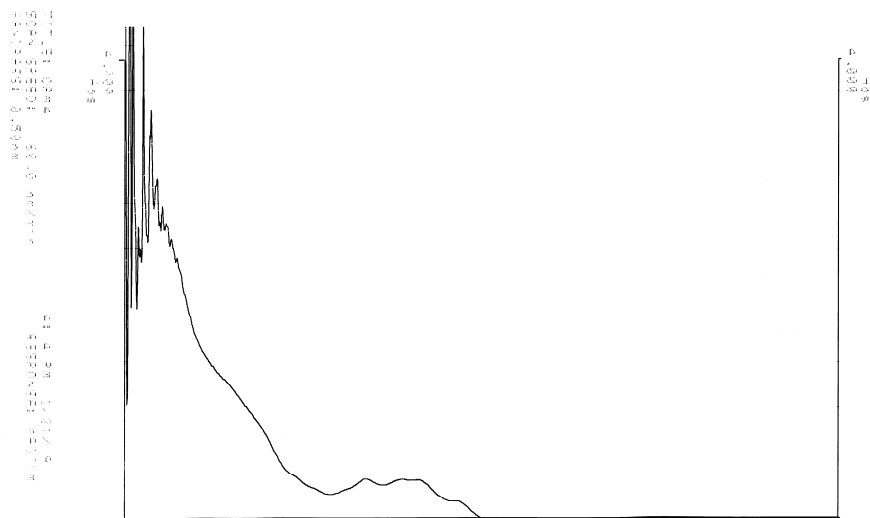

UV spectrum of fraction CPM-4

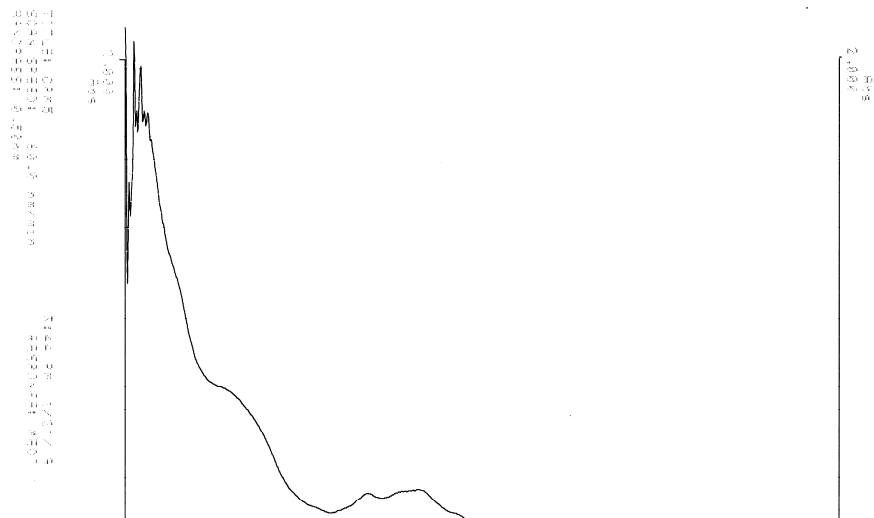

UV spectrum of fraction CPM-5
